# Supplementary material for: Non-metal single/dual doped carbon quantum dots: a general flame synthetic method and electro-catalytic properties
Source: Royal Society of Chemistry journal article supplement (doi:10.1039/c4nr07116f), 2015-01-01
Supplement: c4nr07116f1.pdf [file c4nr07116f1.pdf]

## Non-metal Single/Dual Doped Carbon Quantum Dots: A General Flame Synthetic Method and Electro-catalytic Properties

### Supporting Information

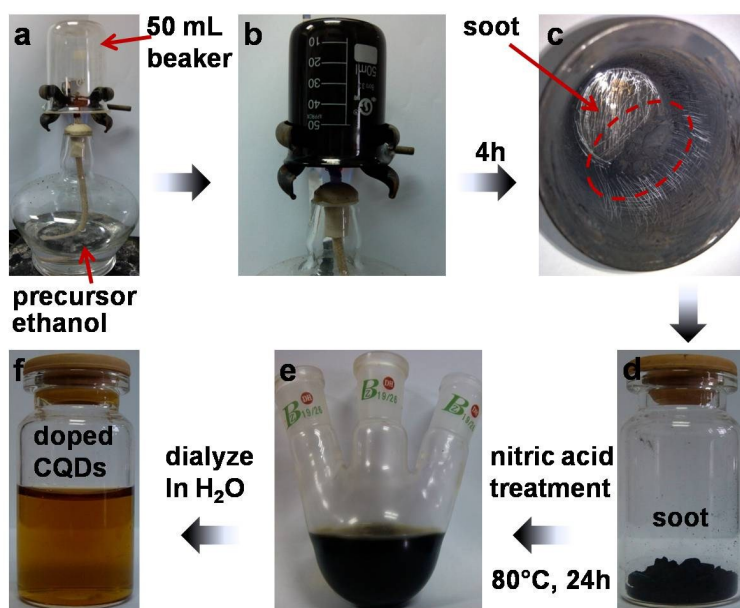

**Fig. S1** The schematic set-up and process of the synthesis of various doped CQDs.

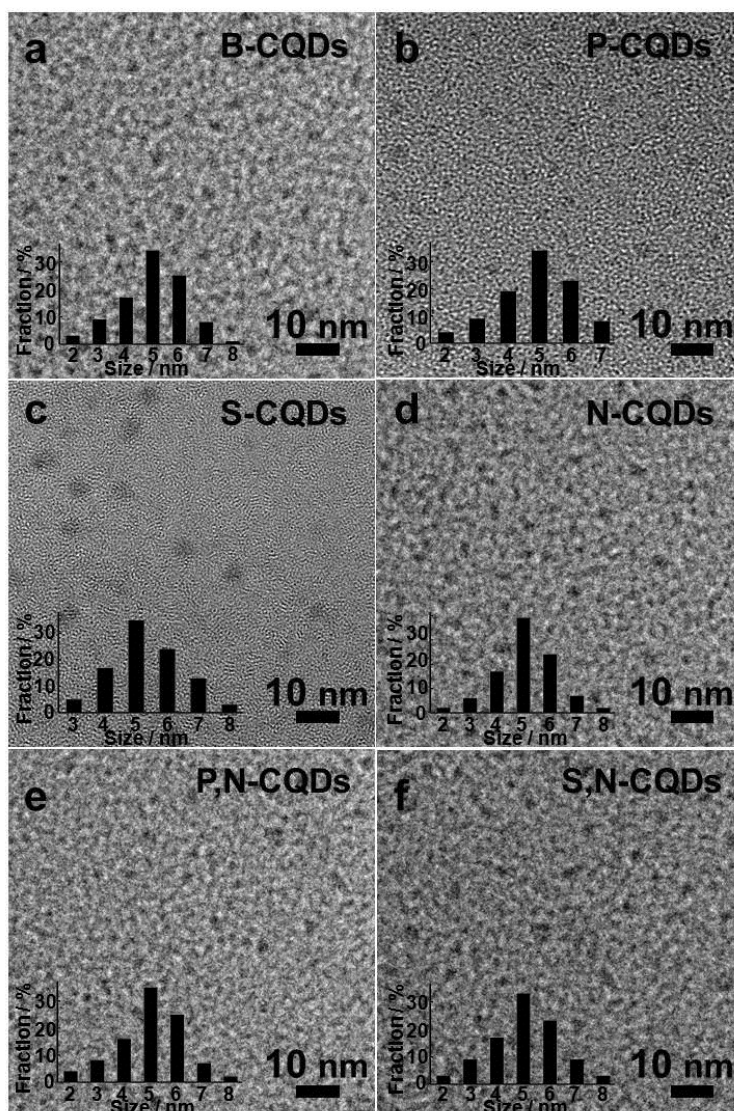

**Fig. S2** TEM images of (a) B-CQDs; (b) P-CQDs; (c) S-CQDs; (d) N-CQDs; (e) P,N-CQDs and (f) S,N-CQDs (the insets are corresponding Particle size distribution).

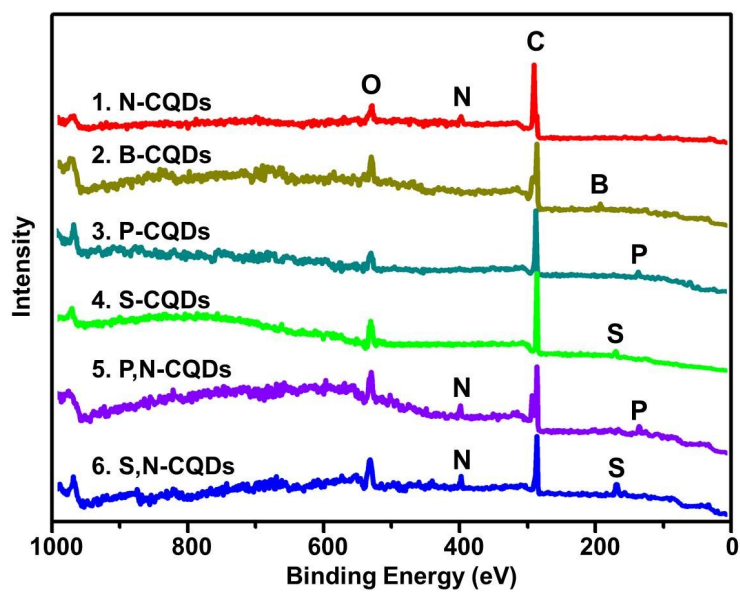

**Fig. S3** The full XPS spectra of various single/dual-doped CQDs.

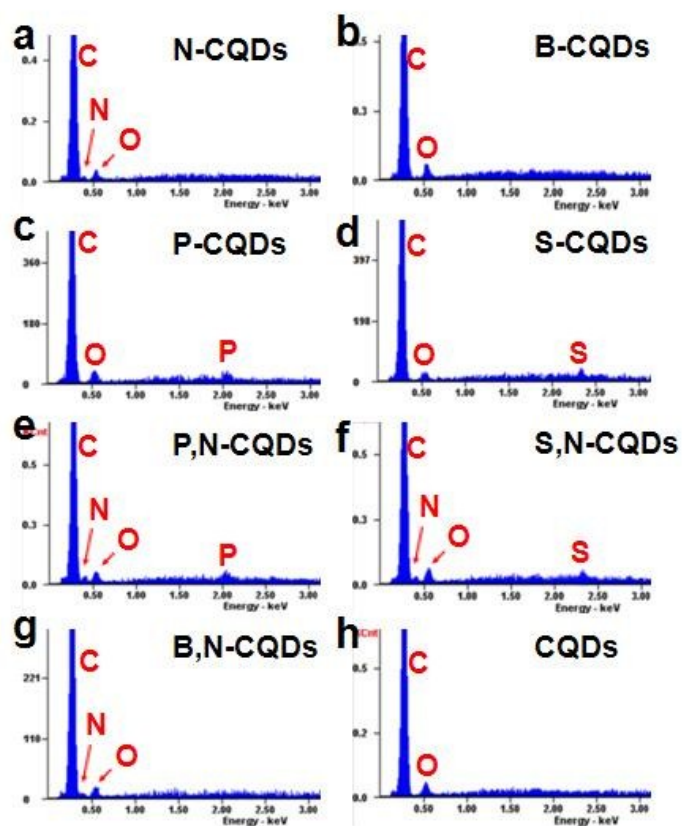

**Fig. S4** The Energy Dispersive X-ray Spectroscopy (EDS) analysis of (a) N-CQDs; (b) B-CQDs; (c) P-CQDs; (d) S-CQDs; (e) P,N-CQDs; (f) S,N-CQDs; (g) B,N-CQDs and (h) CQDs.

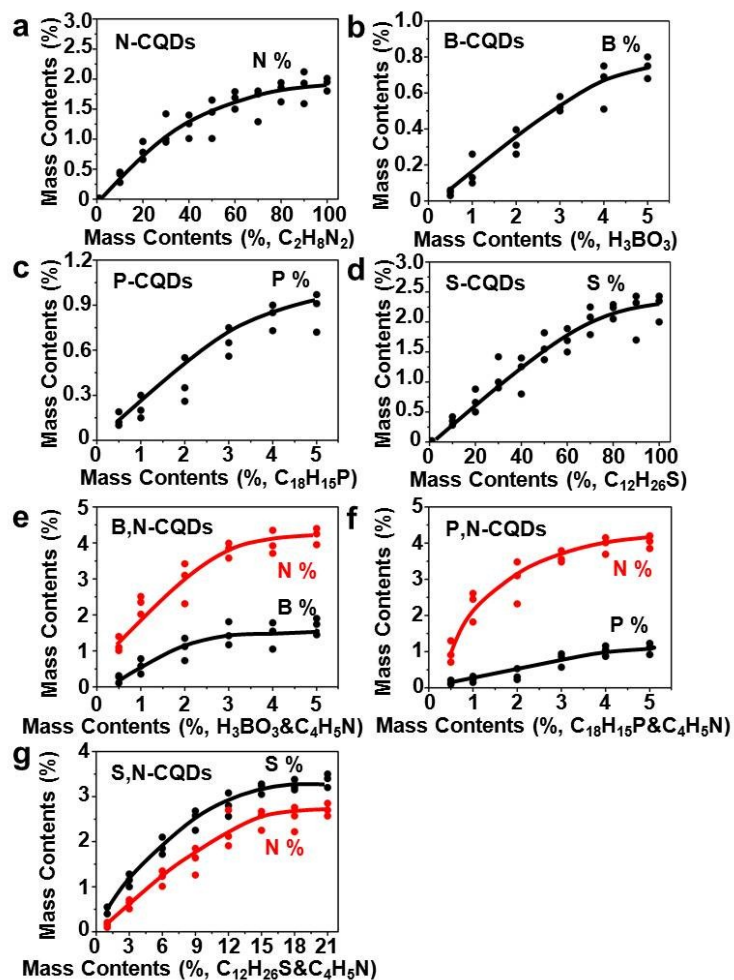

**Fig. S5** The doping contents of different heteroatoms (N, B, P and S) in various single/dual-doped CQDs over the concentrations of precursors in ethanol.

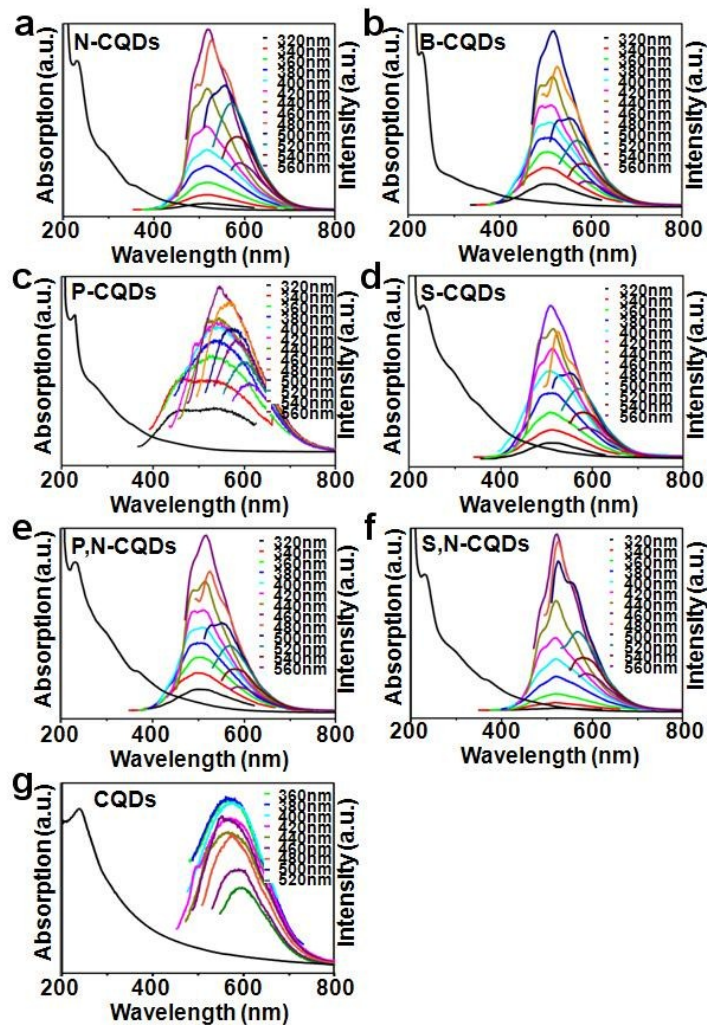

**Fig. S6** UV-Vis absorption and PL spectra (recorded from 320 to 560 nm with 20 nm increment) of the obtained (a) N-CQDs; (b) B-CQDs; (c) P-CQDs; (d) S-CQDs; (e) P,N-CQDs; (f) S,N-CQDs; (g) CQDs (360 to 520 nm with 20 nm increment).

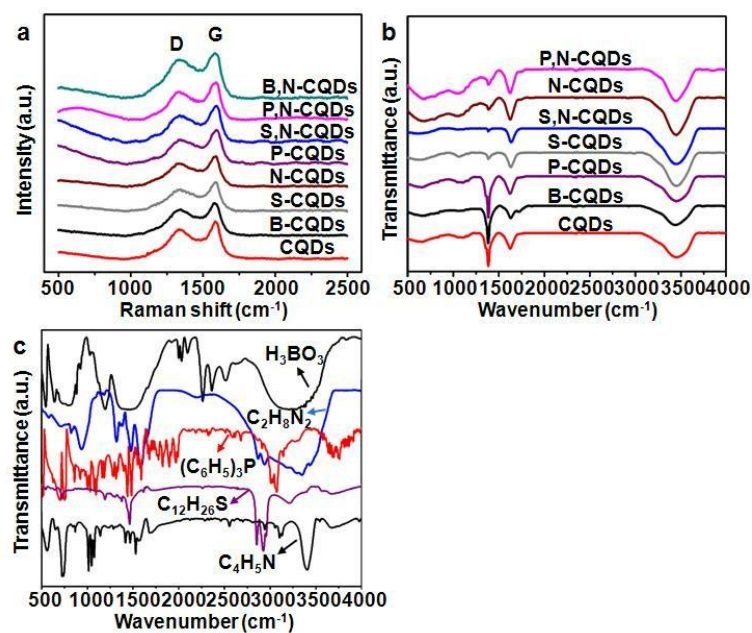

**Fig. S7** (a) Raman and (b) FTIR spectra of various single/dual-doped CQDs; (c) the FTIR spectra of precursors used in the experiments (boric acid, ethylenediamine, dodecanethiol, triphenylphosphine, and pyrrole).

**Table S1** The doping contents of different elements in various single/dual-doped CQDs.

| Sample   | C%   | O%   | B%   | N%  | P%  | S%  |
|----------|------|------|------|-----|-----|-----|
| N-CQDs   | 91.3 | 6.5  | -    | 2.2 | -   | -   |
| B-CQDs   | 89.9 | 9.25 | 0.85 | -   | -   | -   |
| P-CQDs   | 88.8 | 10.2 | -    | -   | 1.0 | -   |
| S-CQDs   | 88.9 | 8.7  | -    | -   | -   | 2.4 |
| B,N-CQDs | 84.5 | 9.1  | 1.9  | 4.5 | -   | -   |
| P,N-CQDs | 83.7 | 10.8 | -    | 4.3 | 1.2 | -   |
| S,N-CQDs | 84.9 | 8.7  | -    | 2.9 | -   | 3.5 |
| CQDs     | 82.6 | 17.4 | -    | -   | -   | -   |

**Table S2** The summary of ORR performance on various catalysts in O<sub>2</sub>-saturated 0.1 M KOH solution.

| Catalysts | Onset potential (V) | Peak potential (V) | Reaction current (mA/cm <sup>2</sup> ) |
|-----------|---------------------|--------------------|----------------------------------------|
| N-CQDs    | -0.14               | -0.36              | -1.6                                   |
| B-CQDs    | -0.19               | -0.38              | -1.1                                   |
| P-CQDs    | -0.13               | -0.31              | -1.6                                   |
| S-CQDs    | -0.17               | -0.37              | -1.4                                   |
| B,N-CQDs  | -0.08               | -0.25              | -2.3                                   |
| P,N-CQDs  | -0.09               | -0.26              | -2.0                                   |
| S,N-CQDs  | -0.11               | -0.28              | -1.2                                   |
| CQDs      | -0.23               | -0.44              | -1.0                                   |

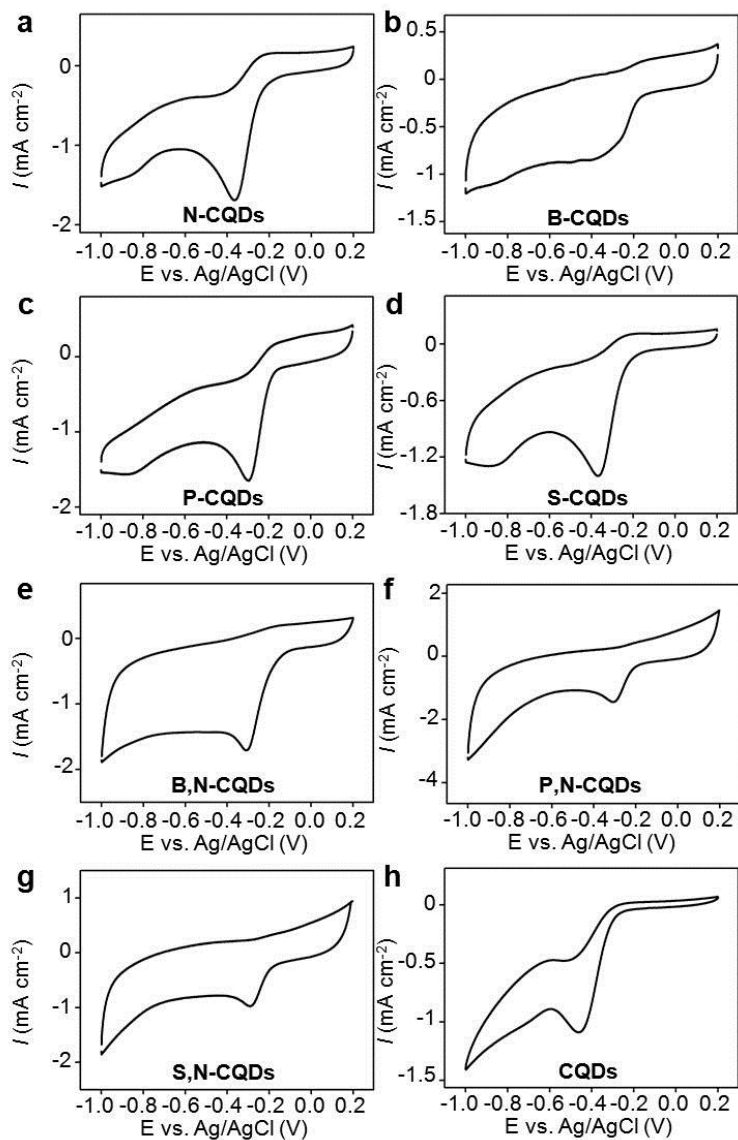

**Fig. S8** CV curves of (a) N-CQDs, (b) B-CQDs, (c) P-CQDs, (d) S-CQDs, (e) B,N-CQDs, (f) P,N-CQDs, (g) S,N-CQDs and (h) CQDs from 0.2 V to -1.0 V vs Ag/AgCl in O<sub>2</sub> saturated 0.1 M KOH aqueous electrolyte. Scan rate is 100 mV s<sup>-1</sup>.

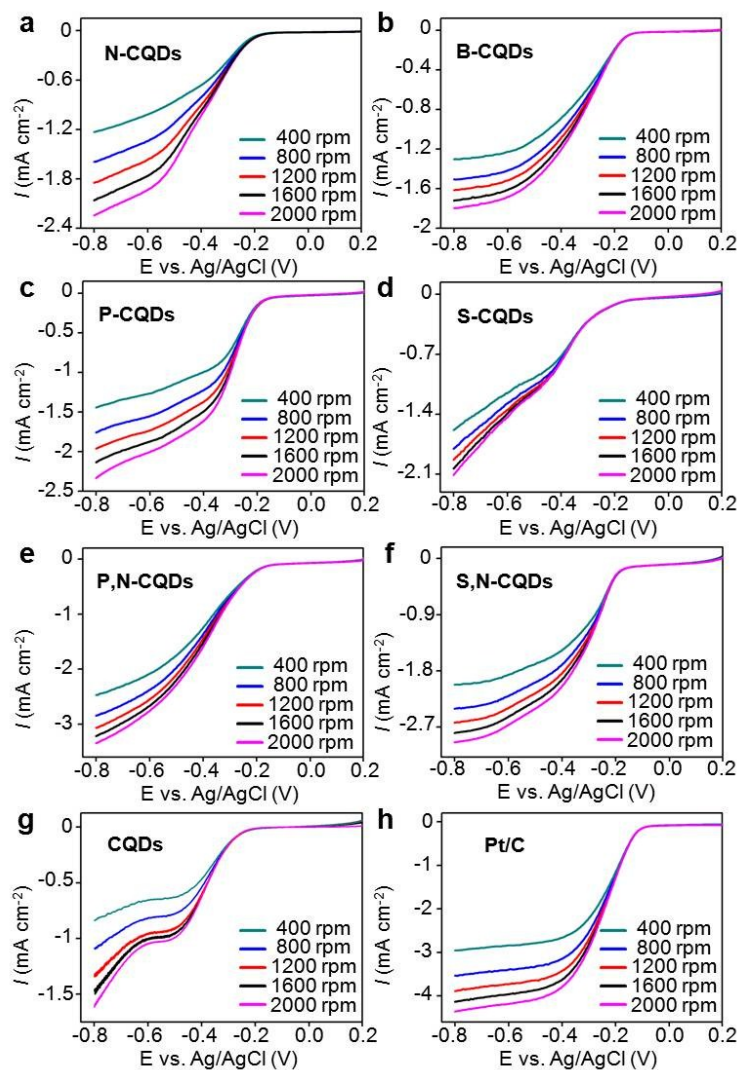

**Fig. S9** LSVs of (a) N-CQDs, (b) B-CQDs, (c) P-CQDs, (d) S-CQDs, (e) P,N-CQDs, (f) S,N-CQDs, (g) CQDs and (h) Pt/C on a RDE at different rotating speeds from 400 rpm to 2000 rpm. All the tests were conducted from 0.2 V to -0.8 V vs Ag/AgCl with scan rate of  $10 \text{ mV s}^{-1}$  in an  $\text{O}_2$  saturated 0.1 M KOH aqueous electrolyte.
